# Supplementary material for: LINC00472 Acts as a Tumor Suppressor in NSCLC through KLLN-Mediated p53-Signaling Pathway via MicroRNA-149-3p and MicroRNA-4270
Source: PubMed Central journal article supplement — Mol Ther Nucleic Acids. 2019 Jun 15;17:563–77. doi: 10.1016/j.omtn.2019.06.003 (PMC6676247; doi:10.1016/j.omtn.2019.06.003), 2019-06-15
Supplement: mmc1.pdf [file mmc1.pdf]

OMTN, Volume 17

## **Supplemental Information**

### **LINC00472 Acts as a Tumor Suppressor in NSCLC through KLLN-Mediated p53-Signaling Pathway via MicroRNA-149-3p and MicroRNA-4270**

**Aimei Zou, Xingli Liu, Zongjiong Mai, Junke Zhang, Zhuohuan Liu, Qilu Huang, Aibing Wu, and Chenyu Zhou**

**Supplementary Table 1** Differential expression of the top 15 significantly up-regulated microRNAs in the GSE53882 chip

| Name             | logFC       | AveExpr     | t           | p.Value     | adj.p.Val   | B            |
|------------------|-------------|-------------|-------------|-------------|-------------|--------------|
| hsa-miR-4459     | 9.598201879 | 52.41809664 | 4.590563763 | 5.49E-06    | 2.73E-05    | 3.297152353  |
| hsa-miR-4270     | 9.495364803 | 50.69225472 | 4.007088624 | 7.00E-05    | 0.00025993  | 0.888602066  |
| hsa-miR-4728-5p  | 6.90720549  | 21.46348703 | 7.460990394 | 3.40E-13    | 9.48E-12    | 19.34353027  |
| hsa-miR-1469     | 6.542374927 | 26.86103262 | 6.369190659 | 4.03E-10    | 4.64E-09    | 12.45681221  |
| hsa-miR-4741     | 6.316713619 | 27.20804924 | 4.620814198 | 4.77E-06    | 2.42E-05    | 3.430307931  |
| hsa-miR-197-5p   | 5.735529116 | 69.13321789 | 2.407625564 | 0.016386847 | 0.03320635  | -4.105704295 |
| hsa-miR-4634     | 5.344022902 | 15.21173948 | 7.244535933 | 1.48E-12    | 3.14E-11    | 17.90639843  |
| hsa-miR-4651     | 4.861107788 | 16.3845797  | 7.409265705 | 4.85E-13    | 1.28E-11    | 18.99696503  |
| hsa-miR-1273g-3p | 4.570442955 | 17.77522159 | 3.581701057 | 0.000371803 | 0.001151027 | -0.672804786 |
| hsa-miR-4298     | 4.320193041 | 16.10696669 | 7.325308268 | 8.60E-13    | 1.98E-11    | 18.43862771  |
| hsa-miR-3937     | 3.515555541 | 9.259725287 | 7.387755993 | 5.62E-13    | 1.42E-11    | 18.85342479  |
| hsa-miR-4497     | 3.311147292 | 23.03851373 | 5.156352264 | 3.53E-07    | 2.28E-06    | 5.920238497  |
| hsa-miR-4667-5p  | 3.14648062  | 21.53320027 | 4.036624426 | 6.20E-05    | 0.000231993 | 1.003156522  |
| hsa-miR-149-3p   | 3.051866257 | 28.54811444 | 2.827980094 | 0.004856015 | 0.011394623 | -3.026579112 |
| hsa-miR-1268a    | 3.003126289 | 13.90278803 | 6.142301797 | 1.57E-09    | 1.63E-08    | 11.14219008  |
